# Supplementary material for: Transmission of SARS-CoV-2 within households: a prospective cohort study in the Netherlands and Belgium – Interim results
Source: bioRxiv or medRxiv preprint supplement (doi:10.1101/2021.04.23.21255846), 2021-05-10
Supplement: Supplementary file [file media-2.pdf]

**Supplement table 1:** Sampling scheme and sample completeness based on the 117 included households (117 index cases and 265 household members).

|                                                  | Enrollment |           |         | ARI symptoms |           | End of study |
|--------------------------------------------------|------------|-----------|---------|--------------|-----------|--------------|
|                                                  | DBS        | NTS       | Stool*  | NTS          | Stool*    | DBS          |
| Total samples requested                          | 382        | 382       | 15      | 78           | 9         | 382          |
| Missing result due to incomplete sampling n(%)   | 13 (3.4%)  | 13 (3.4%) | 3 (20%) | 8 (10.3%)    | 2 (22.2%) | 10 (2.6%)    |
| Missing result due to insufficient sampling n(%) | 97 (25.4%) | -         | -       | -            | -         | 61 (16.0%)   |

\*Stool samples are requested only for children aged 0-2 years 7 days after enrollment or ARI symptom onset.
